# Supplementary material for: Ultraviolet Radiation modelling from ground based and satellite measurements at Reunion Island, Southern Tropics
Source: Copernicus journal article supplement (doi:10.5194/acp-2017-571), 2017-07-24
Supplement: Supplementary file 1 [file acp-2017-571-supplement.pdf]

# ACP-2017-571, Supplement 1: List of acronyms

**ADA** Aerosol Daily Anomaly.

**ALB** Albedo.

**Alpha** Ångström Exponent.

**AOT** Aerosol Optical Thickness.

**BDM** O3XS from Brion et al. (1998) and Malicet et al. (1995).

**BP** O3XS from Bass and Paur (1995).

**CF** Cloud Fraction, fraction of the sky covered by clouds.

**CF-SWF** Cloud Fraction obtained with Long et al.'s (2000) algorithm.

**CF-SYNOP** Cloud Fraction from Meteo-France Hourly Observer Report.

**ESD** Earth-Sun Distance.

**ESFACT** Earth-Sun Correction Factor  $ESFACT = 1/ESD^2$ .

**ETS** Extraterrestrial Spectrum.

**MED** Median.

**MLS** Microwave Limb Sounder, MLS is a microwave limb scanning instrument on-board the Earth Observing System Aura satellite.

**MRD** Mean Relative Difference [%].

**O3XS** Ozone Cross Sections.

**OMI** Ozone Monitoring Instrument.

**OP** Ozone Profile.

**RAF** Radiative Amplification Factor,  $RAF_L$  for RAF derived from a linear law and  $RAF_P$  for a RAF derived from a power-law.

**RD** Relative Difference [%].

**RTUV** Reunion-Tropospheric Ultraviolet Model.

**SAOZ** Système d'Analyse par Observation Zénithal, SAOZ is a UV-visible spectrometer.

**SBUV** Solar Backscatter Ultraviolet Instrument, SBUV is a series of nadir viewing instrument on-board NOAA satellites from 1979 to present days.

**SER** O3XS from Serdyunchenko et al. (2014).

**SSA** Single Scattering Albedo.

**STD** Standard Deviation.

**SUR** Surface Ultraviolet Radiation.

**SYNOP** Hourly Observer Report.

**SZA** Solar Zenith Angle.

**TNO2** Total Nitrogen Dioxide Column.

**TO3** Total Ozone Column.

**TP** Temperature Profile.

**TUV** Tropospheric Ultraviolet Model.

**UV-ALL** UVI from Bentham Measurements with no filtering.

**UV-SWF** UVI filtered with CF-SWF.

**UV-SYNOP** UVI filtered with CF-SYNOP.
